# Supplementary material for: Magnesium Status and Ca/Mg Ratios in a Series of Children and Adolescents with Chronic Diseases
Source: MDPI journal article supplement (doi:10.3390/nu14142941), 2022-07-18
Supplement: s1 [file s1]

# Magnesium Status and Ca/Mg ratios in a Series of Children and Adolescents with Chronic Diseases

Marlene Fabiola Escobedo-Monge <sup>1,\*</sup>, Enrique Barrado <sup>2</sup>, Joaquín Parodi-Román <sup>3</sup>, María Antonieta Escobedo-Monge <sup>4</sup> and José Manuel Marugán-Miguelsanz <sup>5</sup>

**Table S1.** Regression analysis between serum magnesium, dietary magnesium intake and nutritional parameters in the groups by body mass index ( $n = 78$ ).

| Obesity ( $n = 24$ )                                    |                                                                                                                 | Undernutrition ( $n = 30$ )                            |                                                                           | Eutrophic ( $n = 24$ )                                                            |                                                                     |
|---------------------------------------------------------|-----------------------------------------------------------------------------------------------------------------|--------------------------------------------------------|---------------------------------------------------------------------------|-----------------------------------------------------------------------------------|---------------------------------------------------------------------|
| Serum magnesium Magnesium intake                        |                                                                                                                 | Serum magnesium Magnesium intake                       |                                                                           | Serum magnesium Magnesium intake                                                  |                                                                     |
| Linear                                                  | regression                                                                                                      | analyses                                               |                                                                           |                                                                                   |                                                                     |
|                                                         | $r = 0.347, p = 0.002$<br>Height-for-age                                                                        | $r = 0.137, p = 0.048$<br>Height-for-age               | $r = 0.236, p = 0.007$<br>Weight-for-height<br>Z-score                    | $r = 0.281, p = 0.011$<br>Height-for-age<br>Z-score                               |                                                                     |
|                                                         | $r = 0.342, p = 0.005$<br>kilograms muscular<br>mass by A.                                                      | $r = 0.263, p = 0.021$<br>BMI Z-score                  |                                                                           | $r = 0.225, p = 0.030$<br>Weight-for-age Z-<br>score                              |                                                                     |
|                                                         | $r = 0.308, p = 0.009$<br>Waist circumference                                                                   | $r = 0.354, p = 0.002$<br>Waist/height ratio           |                                                                           | $r = 0.298, p = 0.009$<br>Head circumference                                      | $r = 0.187, p = 0.035$<br>Waist/hip ratio                           |
| $r = 0.177, p = 0.046$<br>Polyunsaturated<br>fat intake | $r = 0.368, p = 0.004$<br>BCS absolute value                                                                    |                                                        |                                                                           |                                                                                   |                                                                     |
|                                                         | $r = 0.350, p = 0.003$<br>Serum vitamin B12                                                                     |                                                        | $r = 0.243, p = 0.014$<br>Serum vitamin B12                               | $r = 0.274, p = 0.026$<br>Serum vitamin D                                         |                                                                     |
| $r = 0.193, p = 0.036$<br>Serum zinc                    | $r = 0.279, p = 0.010$<br>Serum phosphorus                                                                      | $r = 0.186, p = 0.020$<br>Serum phosphorus             | $r = 0.292, p = 0.014$<br>BUN                                             |                                                                                   | $r = 0.165, p = 0.049$<br>Leucocytes                                |
| $r = 0.498, p = 0.000$<br>MCH                           | $r = 0.309, p = 0.006$<br>IGF-1                                                                                 | $r = 0.176, p = 0.026$<br>CV risk index                |                                                                           |                                                                                   | $r = 0.210, p = 0.032$<br>CV risk index                             |
| Multilinear                                             | regression                                                                                                      | analyses                                               |                                                                           |                                                                                   |                                                                     |
|                                                         |                                                                                                                 |                                                        | $r = 0.438, p = 0.007$<br>Sum of skinfolds<br>Z-score, waist/hip<br>ratio |                                                                                   | $r = 0.471, p = 0.002$<br>Bicipital skinfold<br>and waist/hip ratio |
|                                                         | $r = 0.824, p = 0.000$<br>Calcium,<br>monosaturated fats,<br>protein, folic acid,<br>and cholesterol<br>intakes |                                                        | $r = 0.759, p = 0.000$<br>Vitamin B12, and<br>zinc intakes                | $r = 0.407, p = 0.006$<br>cholesterol,<br>carbohydrates, and<br>vitamin B1 intake | $r = 0.696, p = 0.000$<br>energy and iodine<br>intakes              |
|                                                         |                                                                                                                 | $r = 0.631, p = 0.000$<br>AST and glucose              |                                                                           |                                                                                   |                                                                     |
| $r = 0.814, p = 0.001$<br>T-lymphocytes<br>CD4 and Ig A | $r = 0.942, p = 0.000$<br>Ig A, complement<br>C3 and Ig G2                                                      | $r = 0.335, p = 0.014$<br>Basophiles and<br>leucocytes | $r = 0.563, p = 0.000$<br>Complement C3<br>and CD4/CD8 ratio              |                                                                                   |                                                                     |

Legend: A: Anthropometry. BMI: Body mass index. BCS: Bone conduction speed. BUN: Blood urea nitrogen. MCH: Mean corpuscular hemoglobin. IGF-1: Insulin-like growth factor-1. CV: Cardiovascular. AST: Aspartate aminotransferase. Ig: Immunoglobulin.

**Table S2.** Regression analysis between serum calcium, dietary calcium intake and nutritional parameters in the groups by body mass index ( $n = 78$ ).

| Obesity ( $n = 24$ )                                      |                                                                            | Undernutrition ( $n = 30$ )                                      |                                                                                                                         | Eutrophic ( $n = 24$ )                                                                                                    |                                                                                               |
|-----------------------------------------------------------|----------------------------------------------------------------------------|------------------------------------------------------------------|-------------------------------------------------------------------------------------------------------------------------|---------------------------------------------------------------------------------------------------------------------------|-----------------------------------------------------------------------------------------------|
| Serum calcium                                             | Calcium intake                                                             | Serum calcium                                                    | Calcium intake                                                                                                          | Serum calcium                                                                                                             | Calcium intake                                                                                |
| Linear                                                    | regression                                                                 | analyses                                                         |                                                                                                                         |                                                                                                                           |                                                                                               |
| $r = 0.328, p = 0.010$<br>Subscapular<br>skinfold Z-score | $r = 0.375, p = 0.003$<br>Fat mass by BIA                                  |                                                                  | $r = 0.145, p = 0.041$<br>BMI Z-score<br>$r = 0.213, p = 0.014$<br>FA/MA index<br>$r = 0.418, p = 0.000$<br>Iron intake | $r = 0.182, p = 0.042$<br>Head<br>circumference                                                                           | $r = 0.173, p = 0.043$<br>Hip circumference<br>$r = 0.440, p = 0.000$<br>Saturated fat intake |
| $r = 0.220, p = 0.032$<br>BCS absolute value              |                                                                            |                                                                  |                                                                                                                         |                                                                                                                           |                                                                                               |
| $r = 0.201, p = 0.032$<br>Beta-carotene                   | $r = 0.271, p = 0.011$<br>Serum vitamin B12                                |                                                                  | $r = 0.185, p = 0.036$<br>Serum vitamin B12                                                                             | $r = 0.225, p = 0.040$<br>Serum vitamin B12                                                                               |                                                                                               |
|                                                           | $r = 0.211, p = 0.027$<br>Serum phosphorus                                 | $r = 0.417, p = 0.000$<br>Serum phosphorus                       | $r = 0.154, p = 0.039$<br>Serum phosphorus                                                                              | $r = 0.199, p = 0.037$<br>Serum zinc                                                                                      |                                                                                               |
| $r = 0.233, p = 0.046$<br>Creatinine                      | $r = 0.357, p = 0.024$<br>AST                                              |                                                                  |                                                                                                                         |                                                                                                                           | $r = 0.318, p = 0.012$<br>T-lymphocytes<br>CD16+56                                            |
| $r = 0.400, p = 0.002$<br>Lymphocytes                     | $r = 0.191, p = 0.042$<br>Lymphocytes                                      |                                                                  | $r = 0.06, p = 0.005$<br>Lymphocytes                                                                                    |                                                                                                                           | $r = 0.178, p = 0.040$<br>MCHC                                                                |
| Multilinear                                               | regression                                                                 | analyses                                                         |                                                                                                                         |                                                                                                                           |                                                                                               |
|                                                           | $r = 0.391, p = 0.006$<br>Height-for-age,<br>bicipital skinfold            |                                                                  | $r = 0.705, p = 0.000$<br>Sum of skinfold,<br>BMI Z-score, height-<br>for-age Z-score, head<br>circumference            |                                                                                                                           |                                                                                               |
|                                                           | $r = 0.734, p = 0.000$<br>Magnesium,<br>vitamin B2, iron and<br>vitamin B6 |                                                                  | $r = 0.460, p = 0.005$<br>BUN, and HDL-<br>cholesterol                                                                  | $r = 0.979, p = 0.000$<br>Glucose, CRP,<br>creatinine,<br>albumin,<br>transferrin, GGT,<br>triglycerides, and<br>ferritin |                                                                                               |
| $r = 0.615, p = 0.014$<br>T-lymphocytes<br>CD8, and CD19  | $r = 0.673, p = 0.007$<br>IgA, and<br>complement C3                        | $r = 0.523, p = 0.001$<br>CD4/CD8 ratio,<br>T-lymphocytes<br>CD4 |                                                                                                                         |                                                                                                                           |                                                                                               |

Legend: A: BMI: Body mass index. BCS: Bone conduction speed. BIA: bioelectrical impedance analysis. FA/MA: Fat area/muscle area. AST: Aspartate amino transferase. MCHC: Mean corpuscular hemoglobin concentration. Ig: Immunoglobulin.

**Table S3.** Regression analysis between serum calcium/magnesium and calcium/magnesium intake ratios and nutritional parameters in the groups by body mass index ( $n = 78$ ).

| Obesity ( $n = 24$ )   |                                 | Undernutrition ( $n = 30$ )          |                                                                  | Eutrophic ( $n = 24$ )                                                  |                                  |
|------------------------|---------------------------------|--------------------------------------|------------------------------------------------------------------|-------------------------------------------------------------------------|----------------------------------|
| Serum Ca/Mg ratio      | Ca/Mg intake ratio              | Serum Ca/Mg ratio                    | Ca/Mg intake ratio                                               | Serum Ca/Mg ratio                                                       | Ca/Mg intake ratio               |
| Linear                 | regression                      | analyses                             |                                                                  |                                                                         |                                  |
| $r = 0.191, p = 0.042$ |                                 |                                      | $r = 0.406, p = 0.000$                                           |                                                                         | $r = 0.182, p = 0.038$           |
| Height-for-age         |                                 |                                      | Weight-for-height                                                |                                                                         | Waist circumference              |
| Z-score                |                                 |                                      | Z-score                                                          |                                                                         | Z-score                          |
| $r = 0.237, p = 0.035$ | $r = 0.270, p = 0.011$          | $r = 0.277, p = 0.017$               | $r = 0.242, p = 0.012$                                           |                                                                         | $r = 0.151, p = 0.038$           |
| Head circumference     | IGFBP3                          | BMI Z-score                          | Waist/height ratio                                               |                                                                         | Waist circumference              |
| $r = 0.190, p = 0.049$ |                                 | $r = 0.165, p = 0.032$               |                                                                  |                                                                         |                                  |
| BCS absolute value     |                                 | Monosaturated fat intake             |                                                                  |                                                                         |                                  |
| $r = 0.529, p = 0.000$ | $r = 0.255, p = 0.017$          |                                      |                                                                  | $r = 0.243, p = 0.020$                                                  |                                  |
| MCH                    | MCV                             |                                      |                                                                  | Basophiles                                                              |                                  |
| Multilinear            | regression                      | analyses                             |                                                                  |                                                                         |                                  |
|                        |                                 |                                      | $r = 0.736, p = 0.000$                                           |                                                                         |                                  |
|                        |                                 | $r = 0.374, p = 0.006$               | Height-for-age Z-score, suprailiac skinfold Z-score, BMI Z-score |                                                                         |                                  |
|                        |                                 | Waist/height and waist circumference |                                                                  |                                                                         |                                  |
|                        | $r = 0.445, p = 0.002$          |                                      | $r = 0.529, p = 0.000$                                           | $r = 0.477, p = 0.002$                                                  | $r = 0.664, p = 0.000$           |
|                        | Magnesium and vitamin B2 intake |                                      | Magnesium and iron intake                                        | Cholesterol and carbohydrates intake                                    | Saturated fat, and niacin intake |
| $r = 0.993, p = 0.000$ |                                 | $r = 0.991, p = 0.000$               | Serum Mg, Ca, and phosphorus                                     | $r = 0.987, p = 0.000$                                                  | $r = 0.537, p = 0.001$           |
|                        |                                 |                                      |                                                                  | Serum Mg and Ca                                                         | Serum vitamin B12 and C          |
|                        | $r = 0.576, p = 0.009$          | $r = 0.694, p = 0.000$               | $r = 0.632, p = 0.001$                                           | $r = 0.778, p = 0.000$                                                  |                                  |
|                        | Cholesterol and prealbumin      | HDL-cholesterol, GGT, and creatinine | ESR, transferrin, and GGT                                        | LDL-cholesterol, total bilirubin, cholesterol, and alkaline phosphatase |                                  |
|                        |                                 | $r = 0.405, p = 0.004$               | $r = 0.673, p = 0.000$                                           |                                                                         |                                  |
|                        |                                 | MCH, and monocytes                   | MCHC, monocytes, MCV, and eosinophiles                           |                                                                         |                                  |
| $r = 0.860, p = 0.000$ |                                 | $r = 0.820, p = 0.000$               | $r = 0.720, p = 0.000$                                           | $r = 0.651, p = 0.000$                                                  | $r = 0.528, p = 0.002$           |
| IgA, T-lymphocytes     |                                 | IgG2, IgG4, complement C3, and IgG1  | Complement C3, T-lymphocytes CD16+56 and CD3                     | Complement C4, IgG3, and complement C3                                  | T-lymphocytes CD19 and IgG2      |
| CD3, complement C4     |                                 |                                      |                                                                  |                                                                         |                                  |
|                        |                                 | $r = 0.200, p = 0.017$               |                                                                  | $r = 0.261, p = 0.015$                                                  |                                  |
|                        |                                 | CV risk index                        |                                                                  | CV risk index                                                           |                                  |

Legend: IGFBP3: insulin-like growth factor-binding protein 3. BMI: Body mass index BCS: Bone conduction speed. MCV: Mean corpuscular volume. GGT: Gamma glutamyl transpeptidase. ESR: Erythrocyte sedimentation rate. MCH: Mean corpuscular hemoglobin. MCHC: Mean corpuscular hemoglobin concentration. Ig: Immunoglobulin. CV: Cardiovascular.

**Table S4.** Regression analysis between serum and dietary calcium and magnesium levels and calcium/magnesium ratios and nutritional parameters in children ( $n = 42$ ).

| Dietary calcium                                             | Dietary magnesium                                         | Ca/Mg intake ratio                                                 | Serum calcium                                                | Serum magnesium                                                         | Serum Ca/Mg ratio                                                             |
|-------------------------------------------------------------|-----------------------------------------------------------|--------------------------------------------------------------------|--------------------------------------------------------------|-------------------------------------------------------------------------|-------------------------------------------------------------------------------|
|                                                             | $r = 0.297$ ,<br>$p = 0.001$<br>Waist/hip ratio           |                                                                    |                                                              | $r = 0.155$ ,<br>$p = 0.001$<br>Waist/hip ratio                         | $r = 0.234$ ,<br>$p = 0.004$<br>Kilograms muscle mass by A.                   |
| $r = 0.345$ ,<br>$p = 0.000$<br>Vitamin A and B1 intake     | $r = 0.318$ ,<br>$p = 0.000$<br>Niacin, folic acid intake | $r = 0.709$ ,<br>$p = 0.000$<br>Niacin, calcium, folic acid intake | $r = 0.197$ ,<br>$p = 0.017$<br>Protein, vitamin E intake    | $r = 0.289$ ,<br>$p = 0.003$<br>Vitamin B1 and E intake                 | $r = 0.280$ ,<br>$p = 0.003$<br>Vitamin B1, saturated fat intake              |
|                                                             |                                                           |                                                                    | $r = 0.445$ ,<br>$p = 0.001$<br>Total protein, AST, ferritin | $r = 0.397$ ,<br>$p = 0.001$<br>HDL-cholesterol total bilirubin         | $r = 0.529$ ,<br>$p = 0.000$<br>HDL-cholesterol, total protein, and bilirubin |
| $r = 0.237$ ,<br>$p = 0.004$<br>Serum vitamin B12           |                                                           | $r = 0.233$ ,<br>$p = 0.004$<br>Serum vitamin B12                  | $r = 0.145$ ,<br>$p = 0.026$<br>Serum magnesium              | $r = 0.450$ ,<br>$p = 0.000$<br>Beta-carotene, serum vitamin D, calcium | $r = 0.905$ ,<br>$p = 0.000$<br>Serum magnesium, calcium, beta-carotene       |
|                                                             |                                                           |                                                                    |                                                              | $r = 0.503$ ,<br>$p = 0.002$<br>IGF-1                                   | $r = 0.270$ ,<br>$p = 0.001$<br>IGFBP3                                        |
| $r = 0.133$ ,<br>$p = 0.026$<br>Eosinophils                 | $r = 0.112$ ,<br>$p = 0.043$<br>Leucocytes                |                                                                    |                                                              |                                                                         |                                                                               |
| $r = 0.327$ ,<br>$p = 0.005$<br>T-lymphocytes CD 4, CD16+56 |                                                           |                                                                    | $r = 0.298$ ,<br>$p = 0.002$<br>T-lymphocytes CD8            | $r = 0.593$ ,<br>$p = 0.000$<br>T-lymphocytes CD8, CD19, IgG2, IgM,     | $r = 0.214$ ,<br>$p = 0.013$<br>IgG2                                          |
|                                                             |                                                           |                                                                    |                                                              | $r = 0.182$ , $p = 0.000$<br>CV risk                                    | $r = 0.322$ ,<br>$p = 0.001$<br>CV risk, transferrin saturation               |

Legend: A: Anthropometry. AST: Aspartate aminotransferase. IGF-1: Insulin-like growth factor-1. IGFBP3: insulin-like growth factor-binding protein 3. Ig: Immunoglobulin. CV: Cardiovascular.

**Table S5.** Regression analysis between serum and dietary calcium and magnesium levels and calcium/magnesium ratios and nutritional parameters in adolescents ( $n = 36$ ).

| Dietary calcium                                                   | Dietary magnesium                                                     | Ca/Mg intake ratio                                                                          | Serum calcium                                                                | Serum magnesium                                     | Serum Ca/Mg ratio                                               |
|-------------------------------------------------------------------|-----------------------------------------------------------------------|---------------------------------------------------------------------------------------------|------------------------------------------------------------------------------|-----------------------------------------------------|-----------------------------------------------------------------|
| $r = 0.409$ ,<br>$p = 0.000$<br>Height-for-age<br>and Waterloo II | $r = 0.297$ ,<br>$p = 0.001$<br>Waist/hip ratio                       |                                                                                             |                                                                              |                                                     |                                                                 |
| $r = 0.448$ ,<br>$p = 0.000$<br>Magnesium,<br>cholesterol intake  | $r = 0.448$ ,<br>$p = 0.000$<br>Calcium, vitamin<br>D intake          | $r = 0.768$ ,<br>$p = 0.000$<br>Calcium, vitamin<br>D, saturated fat<br>folic acid intake - |                                                                              | $r = 0.184$ ,<br>$p = 0.010$<br>Magnesium<br>intake | $r = 0.130$ ,<br>$p = 0.033$<br>Magnesium<br>intake             |
| $r = 0.165$ ,<br>$p = 0.032$<br>Ferritin                          | $r = 0.163$ ,<br>$p = 0.033$<br>Ferritin                              |                                                                                             | $r = 0.232$ ,<br>$p = 0.011$<br>Albumin                                      |                                                     |                                                                 |
|                                                                   | $r = 0.427$ ,<br>$p = 0.000$<br>Serum vitamin D,<br>zinc/copper ratio |                                                                                             |                                                                              | $r = 0.183$ ,<br>$p = 0.016$<br>Serum iron          | $r = 0.991$ ,<br>$p = 0.000$<br>Serum<br>magnesium,<br>calcium, |
|                                                                   |                                                                       | $r = 0.211$ ,<br>$p = 0.007$<br>Basophiles                                                  | $r = 0.320$ ,<br>$p = 0.001$<br>Lymphocytes                                  | $r = 0.267$ ,<br>$p = 0.002$<br>HbCM                | $r = 0.361$ ,<br>$p = 0.004$<br>HbCM,<br>Leucocytes             |
|                                                                   |                                                                       |                                                                                             | $r = 0.570$ ,<br>$p = 0.000$<br>T-lymphocytes<br>CD8, CD19,<br>complement C4 | $r = 0.329$ ,<br>$p = 0.004$<br>Complement C4       | $r = 0.406$ ,<br>$p = 0.001$<br>Complement C4                   |

Legend: MCH: Mean corpuscular hemoglobin.

**Table S6.** Basic characteristic of patients with low bone conduction speed.

| Cases No                              | 1st    | 2nd            | 3rd     | 4th            | 5th     |
|---------------------------------------|--------|----------------|---------|----------------|---------|
| Age (years)                           | 2      | 4              | 10      | 12             | 19      |
| Gender                                | Male   | Male           | Female  | Female         | Female  |
| Nutritional status by body mass index | normal | undernutrition | obesity | undernutrition | obesity |
| BCS Z-score                           | -2.31  | -3.35          | -2.29   | -2.32          | -2.24   |
| Height Z-score                        | normal | normal         | normal  | Low            | normal  |
| Vitamin D (%DRI)                      | 61*    | 15*            | 109     | 56*            | 17*     |
| Calcium (%DRI)                        | 143**  | 103            | 155**   | 89             | 109     |
| Magnesium (%DRI)                      | 111    | 92             | 199**   | 58*            | 116     |
| Calcium/magnesium intake ratio        | 1.29*  | 1.11*          | 0.78*   | 1.28*          | 1.02*   |
| Zinc (%DRI)                           | 24*    | 96             | 93      | 45*            | 83      |
| Serum vitamin D (ng/mL)               | 53     | 85**           | 19*     | 28*            | 10*     |
| Serum calcium (mg/dL)                 | 10.20  | 9.70           | 9.90    | 9.60           | 9.40    |
| Serum magnesium (mg/dL)               | 2.2    | 2.2            | 1.9*    | 2.5**          | 2.1     |
| Serum calcium/magnesium ratio         | 4.6    | 4.41           | 5.21**  | 3.84*          | 4.48    |
| Serum phosphorus (mg/dL)              | 4.5    | 5.2            | 5.4     | 4.7            | 3.7*    |
| Serum zinc (µg/dL)                    | 85     | 76             | 85      | 85             | 92      |
| Serum copper (µg/dL)                  | 163**  | 143**          | 114     | 104            | 113     |
| Copper/zinc ratio                     | 1.92** | 1.88**         | 1.34**  | 1.22**         | 1.23**  |
| Zinc/copper ratio                     | 0.52*  | 0.53*          | 0.75    | 0.82           | 0.81    |
| C-reactive protein U/L                | 10.7** | 3.75           | 6.3**   | 3.75           | 8.5**   |
| Erythrocyte sedimentation rate mm/h   | 22**   | 30**           | 13      | 8              | 13      |

Legend: % DRI: percentage of dietary reference intake (normal values 80-120%DRI). Serum Ca 8.8-10.8 mg/dL [55] and hypercalcemia >11 mg/dL [56]. Symptomatic hypomagnesemia <1.22 mg/dL, asymptomatic hypomagnesemia 1.22-1.82 mg/dL, chronic latent Mg deficiency 1.82-2.07 mg/dL, interval for health 2.07-2.32 mg/dL, asymptomatic hypermagnesemia 2.32-4.86 mg/dL, symptomatic hypermagnesemia >4.86 mg/dL [57]. Deficiency vitamin D < 20 ng/mL, insufficiency vitamin D 20-30 mg/mL [61]. Serum phosphorus in children 4.5-6.5 mg/dL [55]. Hypozincemia levels <70 µg/dL in children under 10 years of age in both sexes and in females >10 years and <74 µg/dL in males older than 10 years [62]. Hypocupremia <70 µg/dL and hypercupremia >140 µg/dL [63]. The Copper/zinc ratio 0.7 to 1.0 [64]. The /copper ratio < 4.0 [65]. \*Low level. \*\*High level.

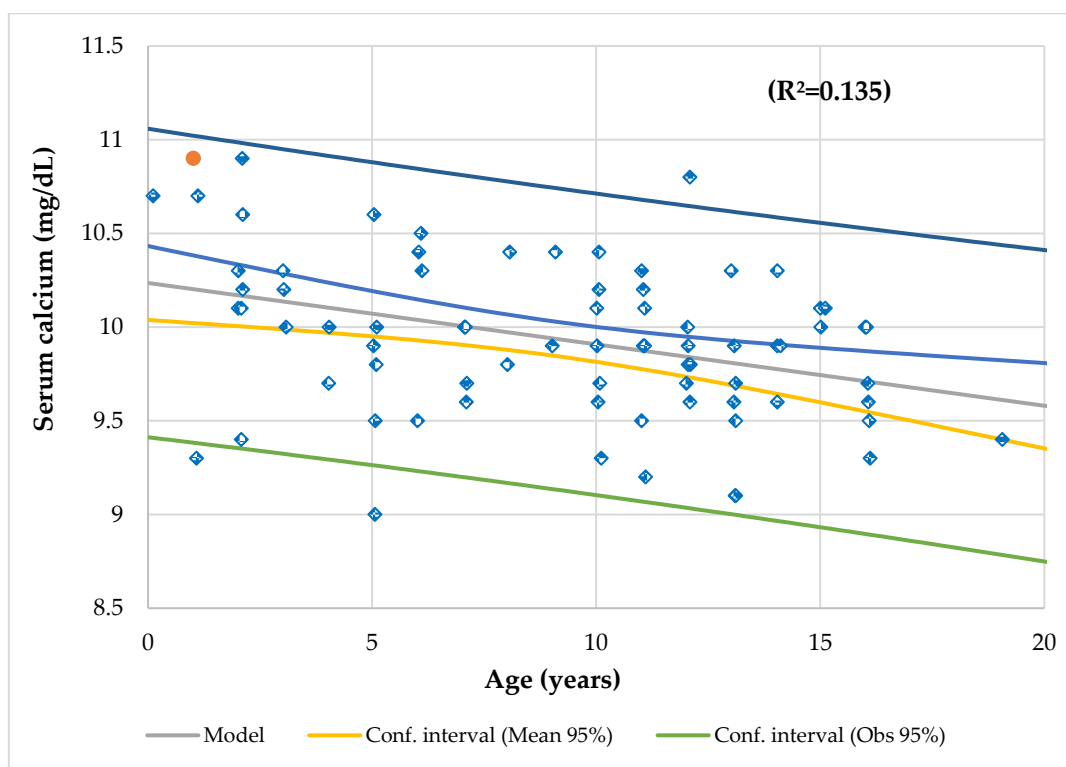

**Figure S1.** Regression serum calcium (mg/dL) by age (years).

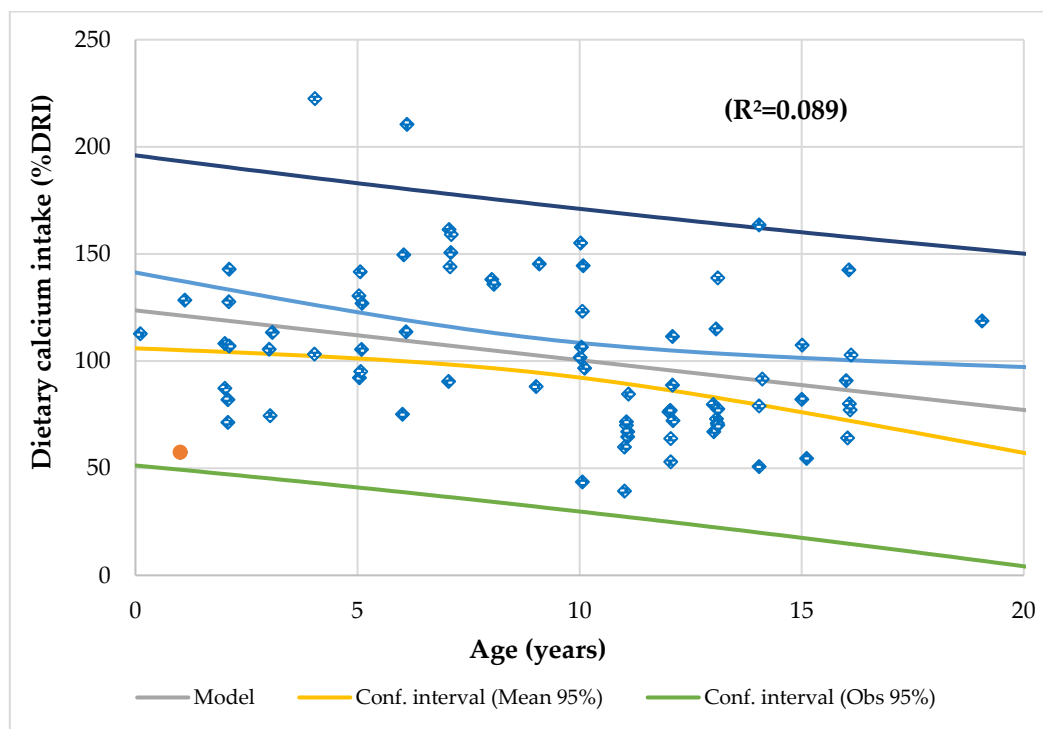

**Figure S2.** Regression dietary calcium intake (%Dietary Reference Intake) by age (years).
